# Supplementary material for: Dynamic Glycoprotein Hyposialylation Promotes Chemotherapy Evasion and Metastatic Seeding of Quiescent Circulating Tumor Cell Clusters in Breast Cancer
Source: PubMed Central journal article supplement — Cancer Discov. 2023 Jun 5;13(9):2050–71. doi: 10.1158/2159-8290.CD-22-0644 (PMC10481132; doi:10.1158/2159-8290.cd-22-0644), 2023-06-05
Supplement: cd-22-0644_supplementary_tables_s1-s2_suppst1.pdf [file cd-22-0644_supplementary_tables_s1-s2_suppst1.pdf]

**Suppl. Table S1. Clinical characteristics of patients with breast cancer (in Suppl. Fig. S1D)**

**A**

|                                        | Patient Number | %    |
|----------------------------------------|----------------|------|
| <b>De novo Stage IV</b>                |                |      |
| No                                     | 124            | 79.5 |
| Yes                                    | 32             | 20.5 |
| N/A = 6                                |                |      |
| <b>Subtype</b>                         |                |      |
| Luminal-like                           | 79             | 49.7 |
| HER2 positive                          | 33             | 22.0 |
| TNBC                                   | 45             | 28.3 |
| N/A = 5                                |                |      |
| <b>Histotype</b>                       |                |      |
| IDC                                    | 126            | 86.9 |
| ILC                                    | 16             | 11.0 |
| Other                                  | 3              | 2.1  |
| N/A = 17                               |                |      |
| <b>Visceral involvement</b>            |                |      |
| No                                     | 66             | 41.3 |
| Yes                                    | 94             | 58.7 |
| N/A = 2                                |                |      |
| <b>Liver</b>                           |                |      |
| No                                     | 104            | 64.2 |
| Yes                                    | 58             | 35.8 |
| <b>Lung</b>                            |                |      |
| No                                     | 107            | 66.1 |
| Yes                                    | 55             | 33.9 |
| <b>CNS</b>                             |                |      |
| No                                     | 149            | 92.0 |
| Yes                                    | 13             | 8.0  |
| <b>Non visceral involvement</b>        |                |      |
| No                                     | 22             | 13.8 |
| Yes                                    | 138            | 86.2 |
| N/A = 2                                |                |      |
| <b>Bone</b>                            |                |      |
| No                                     | 73             | 45.1 |
| Yes                                    | 89             | 54.9 |
| <b>Lymph nodes</b>                     |                |      |
| No                                     | 85             | 52.5 |
| Yes                                    | 77             | 47.5 |
| <b>Chemotherapy</b>                    |                |      |
| No                                     | 54             | 33.3 |
| Yes                                    | 108            | 66.7 |
| <b>Endocrine therapy</b>               |                |      |
| No                                     | 117            | 72.2 |
| Yes                                    | 45             | 27.8 |
| <b>Immunotherapy</b>                   |                |      |
| No                                     | 147            | 90.7 |
| Yes                                    | 15             | 9.3  |
| <b>CDK4/6 inhibition (Palbociclib)</b> |                |      |
| No                                     | 142            | 87.7 |
| Yes (in non-chemo group)               | 20             | 12.3 |
| <b>Treatment line</b>                  |                |      |
| 1                                      | 39             | 27.9 |
| 2                                      | 24             | 17.1 |
| 3                                      | 25             | 17.9 |
| 4                                      | 21             | 15.0 |
| ≥ 5                                    | 31             | 22.1 |
| N/A = 22                               |                |      |
| <b>Clusters at baseline</b>            |                |      |
| Absence                                | 143            | 88.3 |
| Present                                | 19             | 11.7 |
| <b>Clusters at E1</b>                  |                |      |
| Absence                                | 73             | 84.9 |
| Present                                | 13             | 15.1 |
| N/A = 76                               |                |      |

**B Multivariable Cox regression model with overall survival**

|                                | Hazard Ratio | [95% Conf. Interval] |       | P value |
|--------------------------------|--------------|----------------------|-------|---------|
| <b>Liver mets</b>              | 3.57         | 1.12                 | 11.42 | 0.032   |
| <b>Lung mets</b>               | 1.81         | 0.61                 | 5.36  | 0.286   |
| <b>CNS mets</b>                | 3.94         | 1.37                 | 11.34 | 0.011   |
| <b>Therapy line</b>            |              |                      |       |         |
| <b>2</b>                       | 1.61         | 0.28                 | 9.20  | 0.59    |
| <b>≥3</b>                      | 2.12         | 0.55                 | 8.18  | 0.274   |
| <b>CTC cluster at baseline</b> |              |                      |       |         |
|                                | 1.55         | 0.39                 | 6.14  | 0.534   |
| <b>CTC cluster at E1</b>       |              |                      |       |         |
|                                | 4.85         | 1.26                 | 18.72 | 0.022   |

\*Abbreviations

**N/A**, not available

**TNBC**, triple negative breast cancer

**IDC**, invasive ductal carcinoma

**ILC**, invasive lobular carcinoma

**E1**, evaluation timepoint 1

**Suppl. Table S2. Clinical characteristics of breast cancer patients +/- chemo (in Fig 1A)**

|                                 | Received Chemotherapy |         | Chi Square P value |
|---------------------------------|-----------------------|---------|--------------------|
|                                 | No (-)                | Yes (+) |                    |
| <b>De novo Stage IV</b>         |                       |         | 0.123              |
| Non visceral involvement        | 35                    | 80      |                    |
| Yes                             | 14                    | 17      |                    |
| <b>Subtype</b>                  |                       |         | <b>0.008</b>       |
| Luminal-like                    | 31                    | 41      |                    |
| HER2 positive                   | 12                    | 20      |                    |
| TNBC                            | 7                     | 38      |                    |
| <b>Histotype</b>                |                       |         | 0.246              |
| IDC                             | 35                    | 81      |                    |
| ILC                             | 7                     | 9       |                    |
| Other                           | 2                     | 1       |                    |
| <b>Visceral involvement</b>     |                       |         | 0.944              |
| No                              | 21                    | 39      |                    |
| Yes                             | 31                    | 59      |                    |
| <b>Liver metastasis</b>         |                       |         | 0.599              |
| No                              | 35                    | 63      |                    |
| Yes                             | 17                    | 37      |                    |
| <b>Lung</b>                     |                       |         | 0.948              |
| No                              | 33                    | 64      |                    |
| Yes                             | 19                    | 36      |                    |
| <b>CNS</b>                      |                       |         | 0.735              |
| No                              | 47                    | 92      |                    |
| Yes                             | 5                     | 8       |                    |
| <b>Non visceral involvement</b> |                       |         | 0.182              |
| No                              | 4                     | 15      |                    |
| Yes                             | 48                    | 83      |                    |
| <b>Bone</b>                     |                       |         | <b>0.041</b>       |
| No                              | 17                    | 50      |                    |
| Yes                             | 35                    | 50      |                    |
| <b>Lymph nodes</b>              |                       |         | 0.176              |
| No                              | 32                    | 50      |                    |
| Yes                             | 20                    | 50      |                    |
| <b>Taxanes</b>                  |                       |         | <b>0.001</b>       |
| No                              | 52                    | 81      |                    |
| Yes                             | 0                     | 19      |                    |
| <b>Endocrine therapy</b>        |                       |         | <b>&lt; 0.001</b>  |
| No                              | 18                    | 91      |                    |
| Yes                             | 34                    | 9       |                    |
| <b>Immunotherapy</b>            |                       |         | 0.517              |
| No                              | 48                    | 89      |                    |
| Yes                             | 4                     | 11      |                    |
| <b>Treatment line</b>           |                       |         | 0.148              |
| 1                               | 19                    | 20      |                    |
| 2                               | 7                     | 16      |                    |
| ≥3                              | 22                    | 49      |                    |
| <b>Clusters at baseline</b>     |                       |         | 0.438              |
| Absence                         | 47                    | 86      |                    |
| Present                         | 5                     | 14      |                    |
| <b>Clusters at E1</b>           |                       |         | 0.135              |
| Absence                         | 30                    | 36      |                    |
| Present                         | 3                     | 10      |                    |

\*Abbreviations

**N/A**, not available

**TNBC**, triple negative breast cancer

**IDC**, invasive ductal carcinoma

**ILC**, invasive lobular carcinoma

**E1**, evaluation timepoint 1
